# Supplementary material
Source: MDPI journal article supplement (https://www.mdpi.com/1999-4907/14/5/872)
Supplement: s1 [file s1]

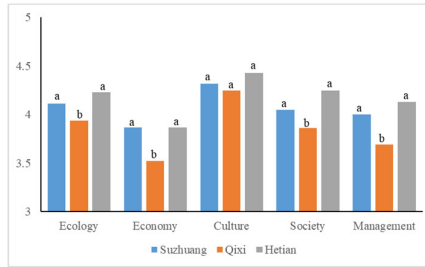

**Figure S1.** Perception of livelihood environment by people in three towns

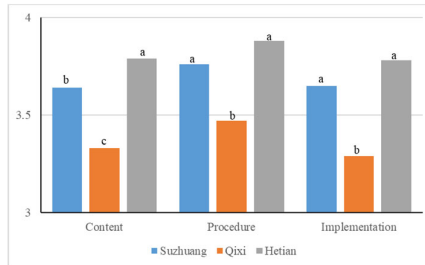

**Figure S2.** Perception of easement reform in three towns

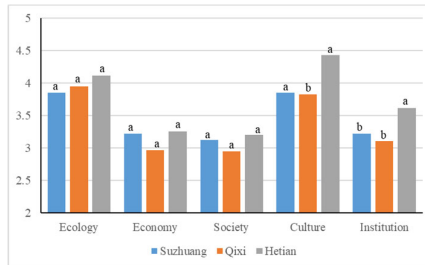

**Figure S3.** Perception of the outcomes of easement reform in three towns

**Table S1.** Variables of livelihood assets and their measurement

| Livelihood asset | Variable                                       | Measurement                                                            | Weight |
|------------------|------------------------------------------------|------------------------------------------------------------------------|--------|
| Human            | H1 Health of household owner                   | 1=sick, 2=average, 3=healthy                                           | 0.053  |
|                  | H2 Education of household owner                | 1=primary and below, 2=junior, 3=senior, 4=college and above           | 0.063  |
|                  | H3 Labour ratio                                | The ratio of the number of working people to all people in a household | 0.040  |
|                  | H4 Household average education                 | The average education of all adult people in a family                  | 0.027  |
| Natural          | N1 Farmland condition                          | Area×quality (1=very poor, 5=very good)                                | 0.006  |
|                  | N2 Orchard condition                           | Area×quality (1=very poor, 5=very good)                                | 0.004  |
| Financial        | F1 Household annual income in cash             | Actual value                                                           | 0.025  |
|                  | F2 Credit status                               | Debt value a×convenience (1=not convenient, 2=average, 3=convenient)   | 0.005  |
|                  | F3 Government subsidies                        | 1=yes, 0=no                                                            | 0.005  |
| Physical         | P1 Built-up area of the house                  | Actual area                                                            | 0.016  |
|                  | P2 Poultry                                     | The actual number of chickens, ducks and geese                         | 0.028  |
|                  | P3 Livestock                                   | The actual number of pigs, cattle, sheep and horses                    | 0.015  |
|                  | P4 Durable property                            | Total number of TV, fridge, laptop, car, etc.                          | 0.014  |
|                  | P5 Infrastructure                              | Satisfaction: 1=very poor, 5=very good                                 | 0.127  |
| Social           | S1 Family member in the village committee      | 1=yes, 0=no                                                            | 0.090  |
|                  | S2 Relatives in a position of local government | 1=yes, 0=no                                                            | 0.149  |
|                  | S3 Membership of production cooperatives       | Actual number                                                          | 0.054  |
|                  | S4 Expenditure on cash gifts                   | Actual value                                                           | 0.054  |
|                  | S5 Weekly web surfing time                     | Actual number                                                          | 0.078  |
| Institutional    | I1 Customaries of resource use                 | 1=no aware, 5=fully aware                                              | 0.069  |
|                  | I2 Formal regulations of the national park     | 1=no aware, 5=fully aware                                              | 0.079  |

**Table S2.** Variables of perception of livelihood environment

| <b>Livelihood environment</b> | <b>Variable</b>                                                                                                                                                                              |
|-------------------------------|----------------------------------------------------------------------------------------------------------------------------------------------------------------------------------------------|
| Ecology                       | B1: Ecological status of QNP<br>B2: Support of conservation policy                                                                                                                           |
| Economy                       | B3:Support of conserving forest for generations<br>B4: Livelihood dependency on farmland<br>B5: Easement reform increases income<br>B6: Collectively-owned forests generate economic benefit |
| Culture                       | B7: Protecting forest is a local tradition<br>B8: I love my hometown                                                                                                                         |
| Society                       | B9: Easement reform benefits QNP management<br>B10: I would like to see my hometown becomes a conservation model                                                                             |
| Management                    | B11: I understand QNP management<br>B12: QNP emphasises community development in its management                                                                                              |

**Table S3.** Variables to measure the acceptance of the conservation easement

| <b>Easement</b> | <b>Variable</b>                                                                                                                                                                                                                                                                                                                                                                                            |
|-----------------|------------------------------------------------------------------------------------------------------------------------------------------------------------------------------------------------------------------------------------------------------------------------------------------------------------------------------------------------------------------------------------------------------------|
| Content         | C1: Suitability of the compensation standard of 48.5 yuan/year<br>C2: Suitability of issuing the compensation in a monetary way<br>C3: Suitability of the priority of concession to easement holders<br>C4: Suitability of the priority of QNP branding to easement holders<br>C5: Feasibility of taking the responsibility of assisting QNP management<br>C6: Suitability of restrictions of resource use |
| Procedure       | C7: Participation in the easement reform in person and as village committee<br>C8: Credibility of the village committee as a mediator<br>C9: Legitimacy of signing contract between the park agency and the village                                                                                                                                                                                        |
| Implementation  | C10: Suitability of the punishment of breaking the contract<br>C11: Suitability of the length of the contract period<br>C12: Efficiency of conflict resolution of the contract                                                                                                                                                                                                                             |

Table S4 Variables to assess the outcomes of the conservation easement

| Outcomes               | Variable                                            |
|------------------------|-----------------------------------------------------|
| Ecological outcomes    | D1: Human disturbance to forest                     |
| Economic outcomes      | D2: Annual household income                         |
|                        | D3: Capacity to make a living                       |
| Social outcomes        | D4: Popularity of QNP*                              |
| Cultural outcomes      | D5: Community conservation awareness                |
| Institutional outcomes | D6: Participation in QNP management                 |
|                        | D7: Formulation and implementation of customaries** |
|                        | D8: Establishment of rural economic cooperatives**  |

\* Five scales are: 1=county, 2=City, 3=Province, 4=National, 5=International

\*\* Five scales are: 1=no such things, 2=under preparation, 3=under operation, 4=new ones coming, 5=new ones under operation
